# Supplementary material
Source: publisher site journal article supplement (https://www.dovepress.com/article/513982)
Supplement: Supplementary file 1 [file get_supplementary_file.php]

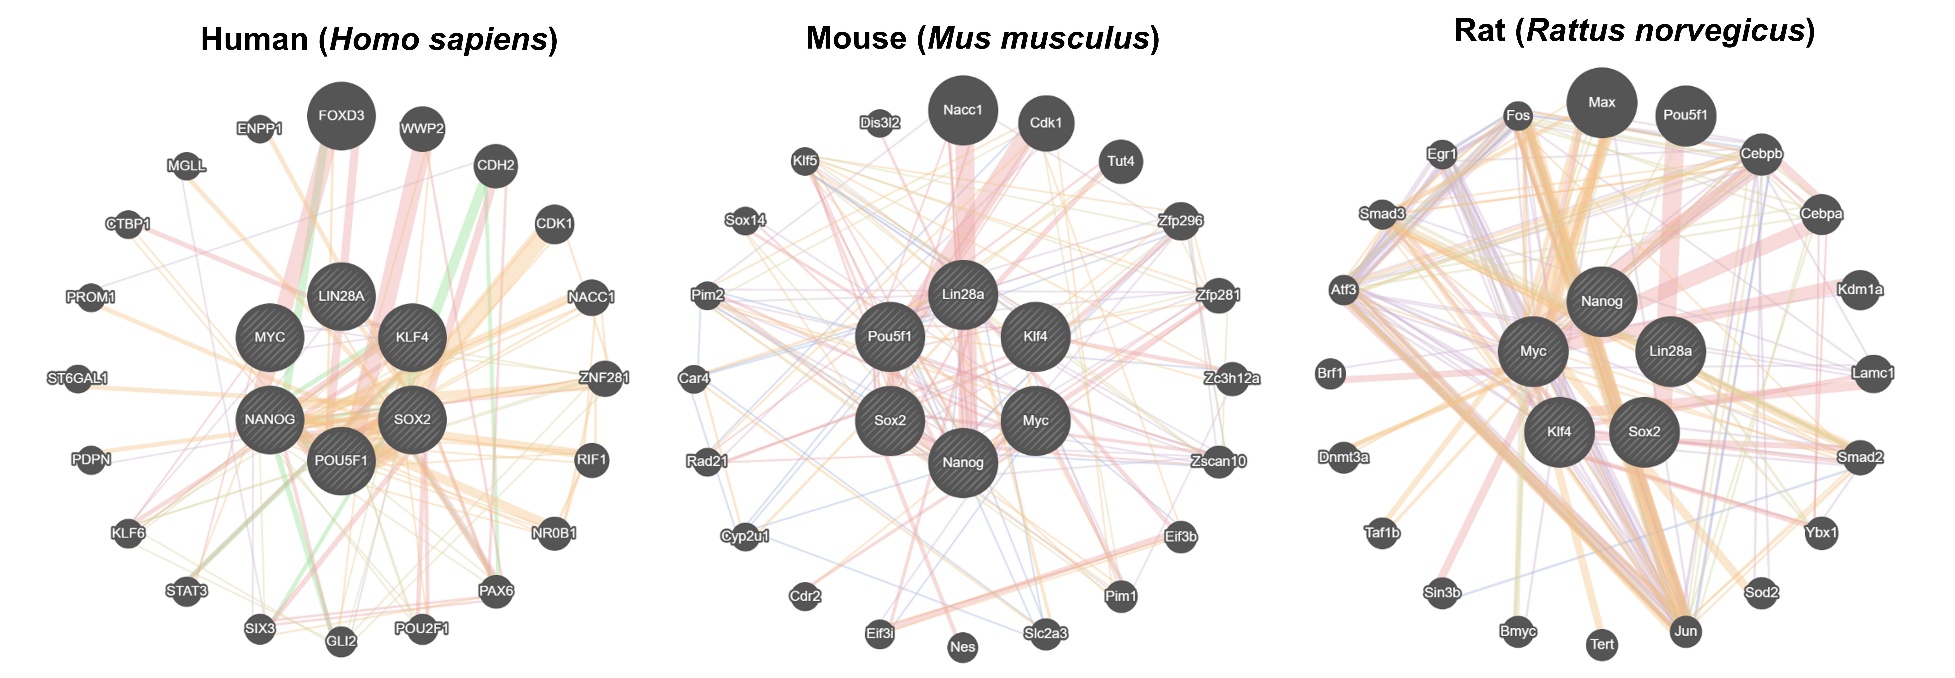


**Supplementary Figure 1. The main differences between the pluripotency factors networks in different animals.**
